# Supplementary material for: Lipoprotein (a) upregulates ABCA1 in liver cells via scavenger receptor-B1 through its oxidized phospholipids
Source: PubMed Central journal article supplement (PMC4479336; doi:10.1194/jlr.m056150), 2015-07

**Supplementary Table 1: Sequences of gene specific primers used for RT-PCR.**

| <b>Gene</b>   | <b>Forward Primer (5'-3')</b> | <b>Reverse Primer (5'-3')</b> |
|---------------|-------------------------------|-------------------------------|
| ABCA1         | GGTAGGAGAAAGAGACGCAAAC        | AACAAAACAATAACGCCCAAGT        |
| $\beta$ -2M   | TTTCATCCATCCGACATTGA          | CCTCCATGATGCTGCTTACA          |
| LXR $\alpha$  | CGGGCTTCCACTACAATGTT          | TCAGGCGGATCTGTTCTTCT          |
| PPAR $\gamma$ | GTGTTGGTGATAGGTCCGAAAT        | CCCAAGTGAATTGGATTCTTCT        |
| GAPDH         | GCACCCTGGTCTGAGGTAAAT         | AGGAGTGGGAGCACAGGTAAG         |

Supplementary figures:

**Supplementary Figure 1: Agarose gel electrophoresis of purified Lp(a) and LDL.**

(A) Gel stained with Fat Red 7B. (B) Western blot of gel with anti-apo(a) antibody. (C) Western blot of gel with anti-apoB antibody. (D) Western blot of gel with anti-apoA1.

**Supplementary Figure 2: Lp(a) upregulates ABCA1, PPAR $\gamma$  and LXR $\alpha$  in Hep3B cells.**

Hep3B cells were treated with 5  $\mu$ g/ml purified Lp(a) protein for 12 hours at 37 $^{\circ}$  C. (A) ABCA1 mRNA levels after treatment with Lp(a) were determined by RT-PCR. mRNA levels were normalized against  $\beta$ 2-microglobulin and GAPDH mRNA and expressed relative to that of control untreated cells. (B) ABCA1 protein levels were determined by western blot. Protein levels were normalized against actin and were expressed relative to control. (C) PPAR $\gamma$  mRNA levels, (D) PPAR $\gamma$  protein levels, (E) LXR $\alpha$  mRNA levels, (F) LXR $\alpha$  protein levels. Results are expressed as mean  $\pm$  S.E of triplicates for RT-PCR and triplicate western blots for protein quantification. \*, p< 0.05 \*\*, p< 0.01 \*\*\*, p< 0.001 compared with control.

**Supplementary Figure 3: SR-B1 inhibitor, BLT-1 blocks ABCA1 protein expression and lipid uptake from Lp(a):**

(A) HepG2 cells treated with 5  $\mu$ g/ml Lp(a) were preincubated with 100  $\mu$ M of BLT-1 and the effect on ABCA1 protein levels determined. ABCA1 protein levels were normalised to actin and expressed relative to the untreated control. (B) Lipid uptake in cells treated with 5  $\mu$ g/ml Dil-labelled Lp(a) after preincubation with 100  $\mu$ M of BLT-1. The relative fluorescence intensity of Dil in cell lysates was measured at 549 nm excitation and 565 nm emission spectra. (C) Apo(a) uptake in cells treated with 5  $\mu$ g/ml Lp(a) after preincubation with 100  $\mu$ M of BLT-1. After treatment, cells lysates were incubated with an anti-apo(a) antibody and detected with AlexaFluor 488 IgG antibody. The relative fluorescence intensity of AlexaFluor 488 at excitation spectra 500 nm and emission spectra at 520 nm was measured. Results are expressed as mean  $\pm$  S.E of triplicates of at least one experiment. \*, p< 0.05, \*\*\*\*, p< 0.0001 compared with control.

# Supplementary Figure 1

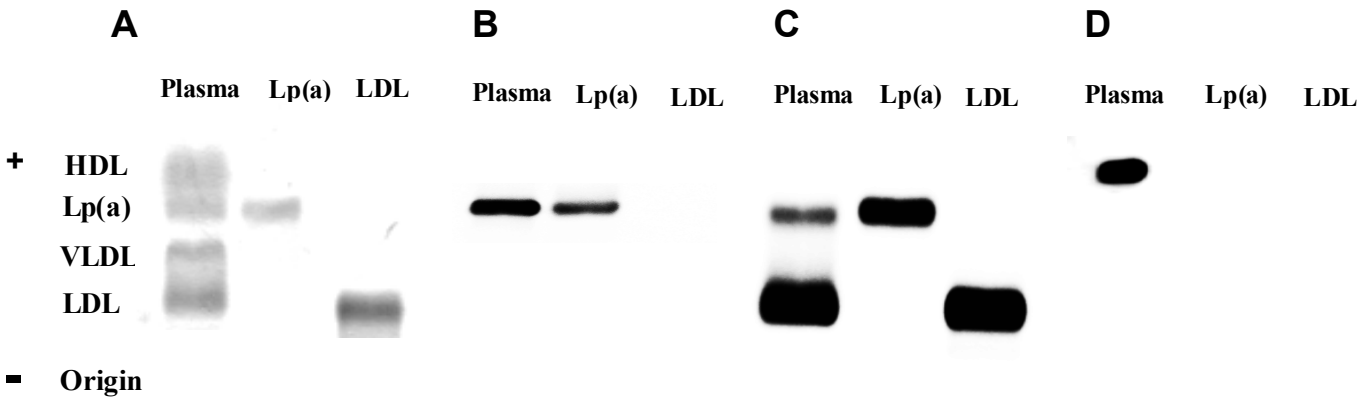

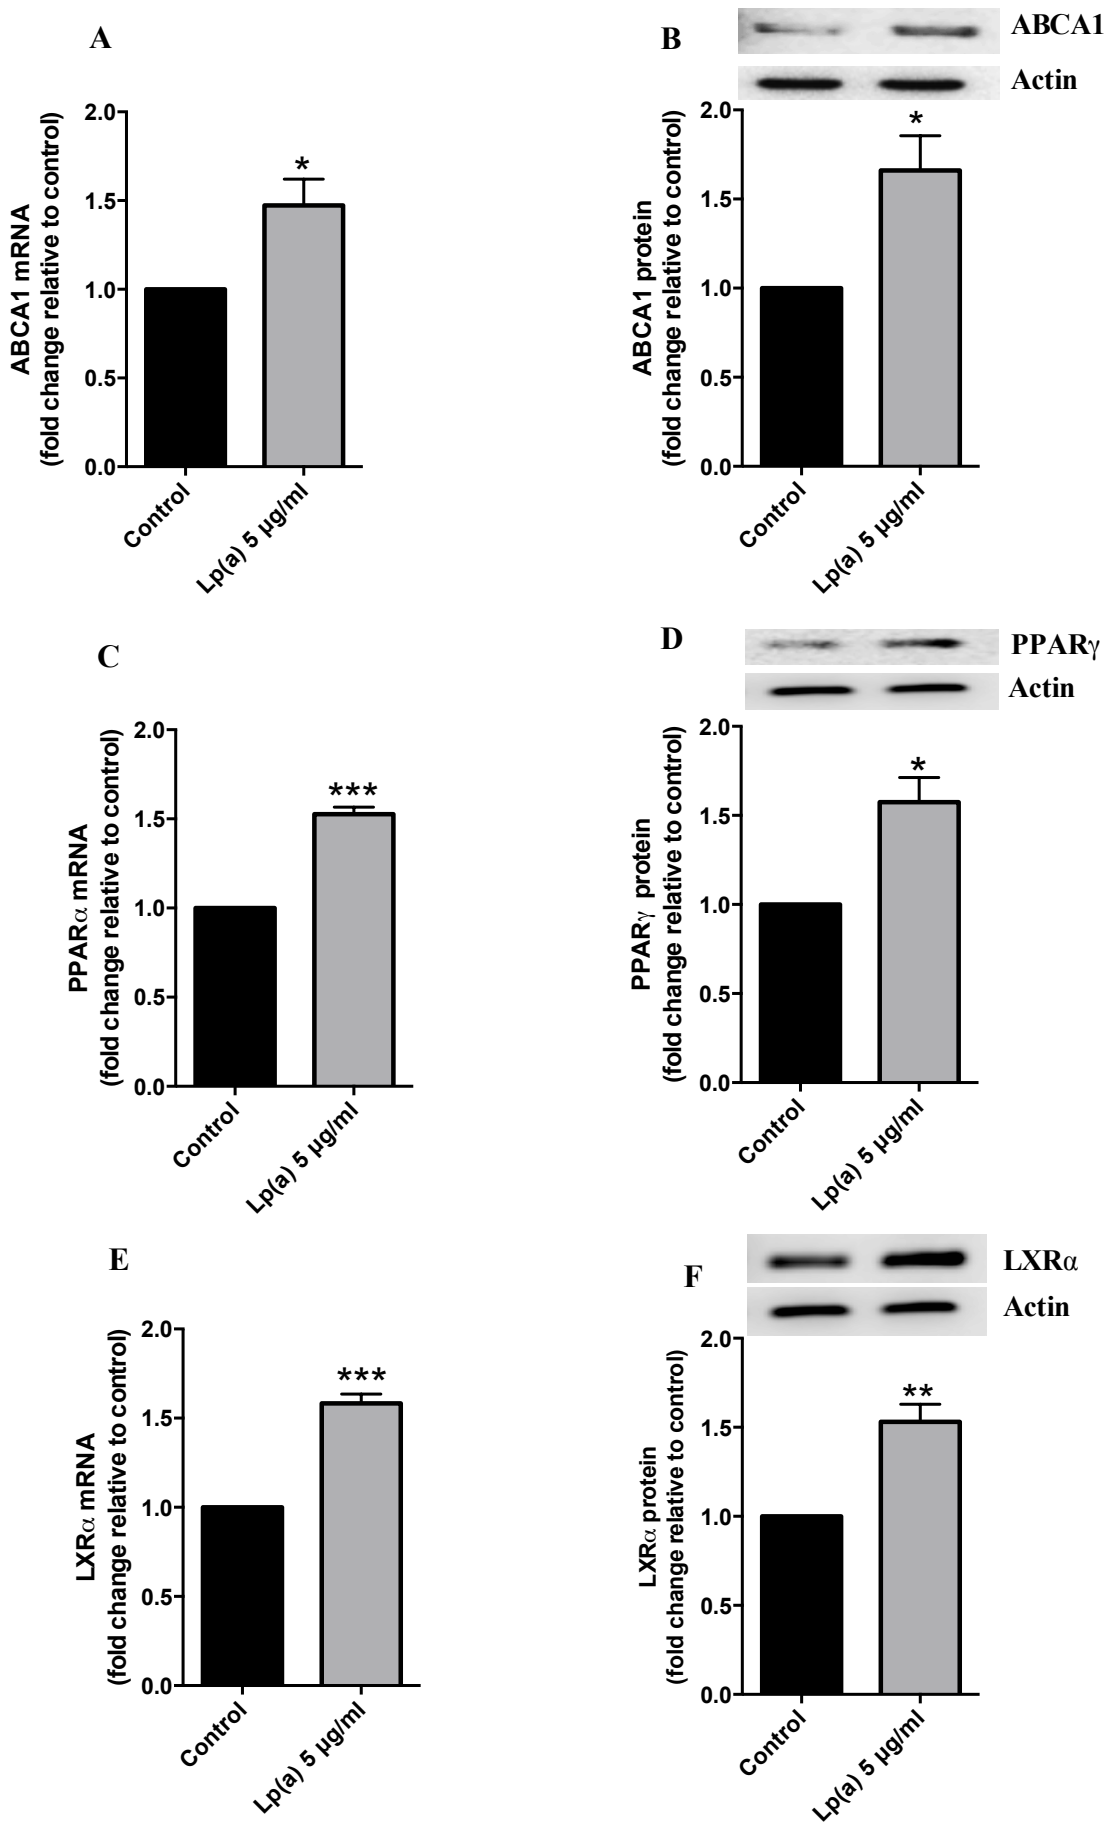

**A**

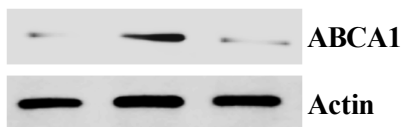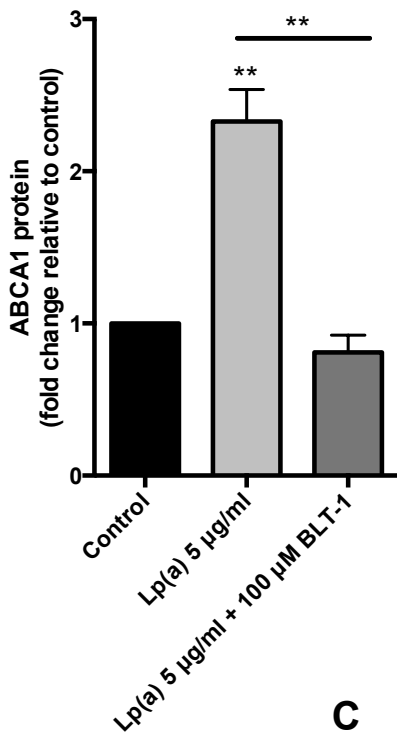

**B**

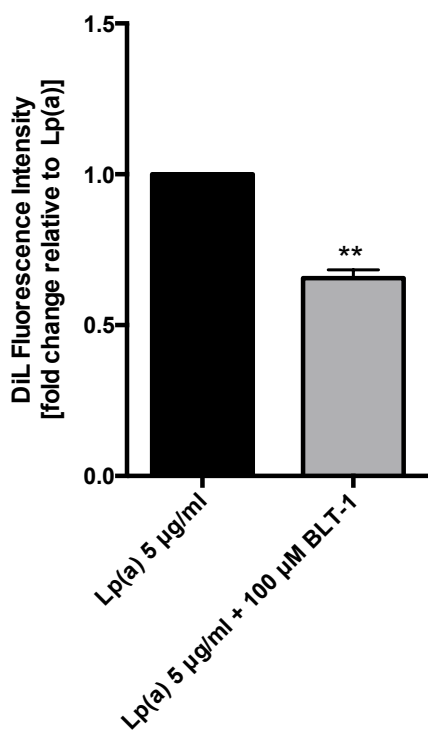

**C**

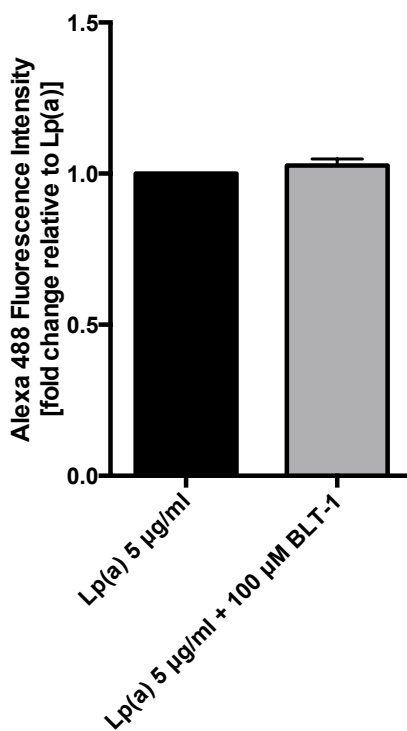

Supplement: supp_M056150_jlr.M056150-1.pdf [file supp_M056150_jlr.M056150-1.pdf]
